# Supplementary material for: Microtubules in Bacteria: Ancient Tubulins Build a Five-Protofilament Homolog of the Eukaryotic Cytoskeleton
Source: PubMed Central journal article supplement (PMC3232192; doi:10.1371/journal.pbio.1001213), 2011-12-06
Supplement: pbio.1001213.s003.pdf [file pbio.1001213.s003.pdf]

**A**

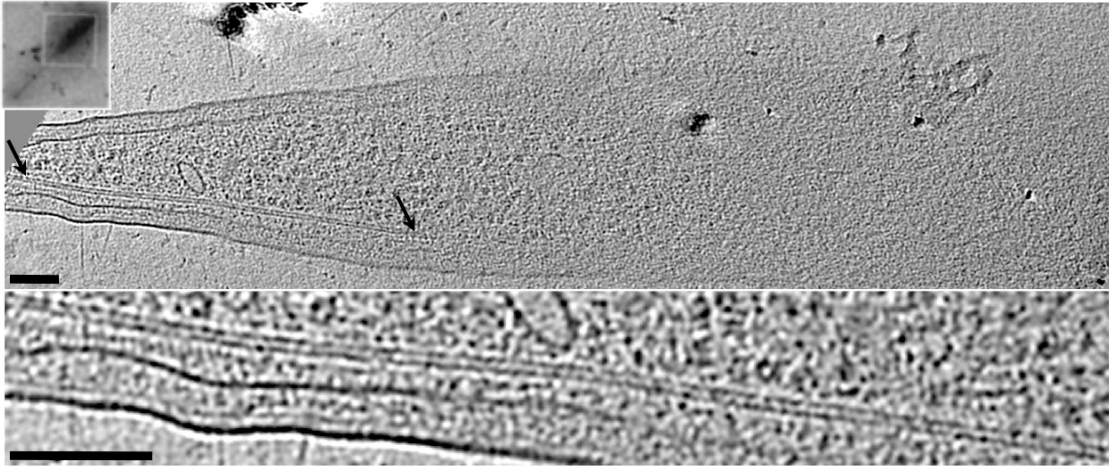

**B**

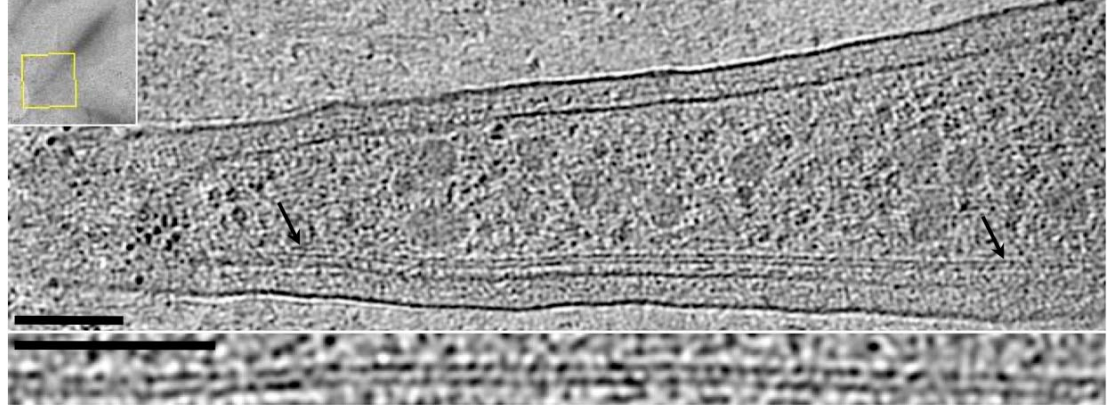

**C**

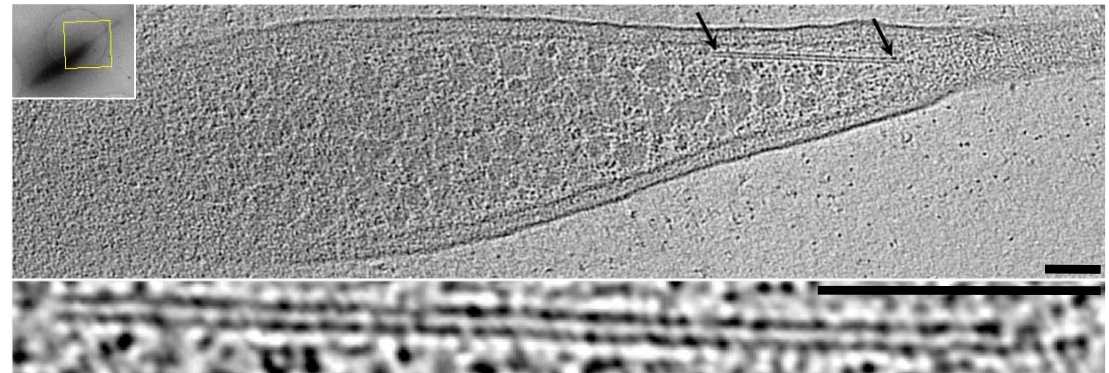

D

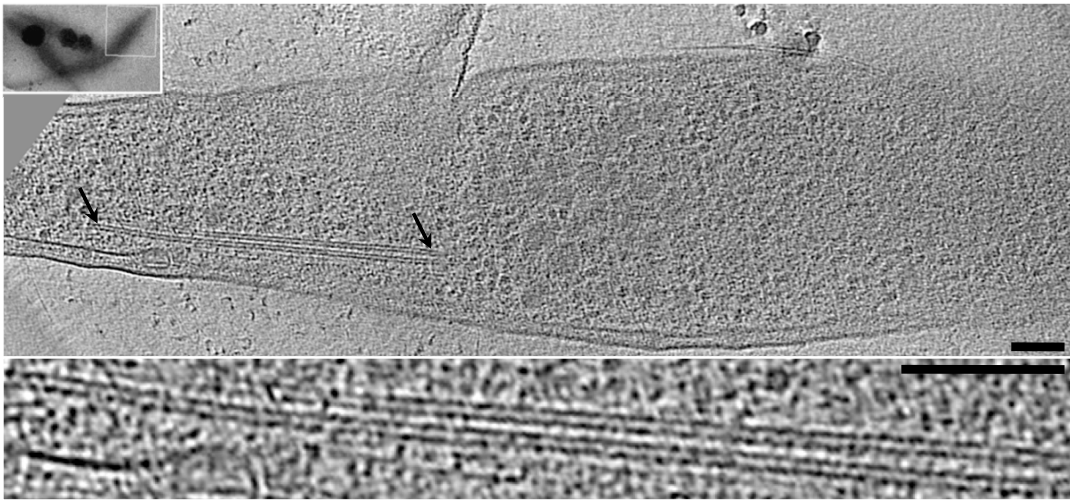

E

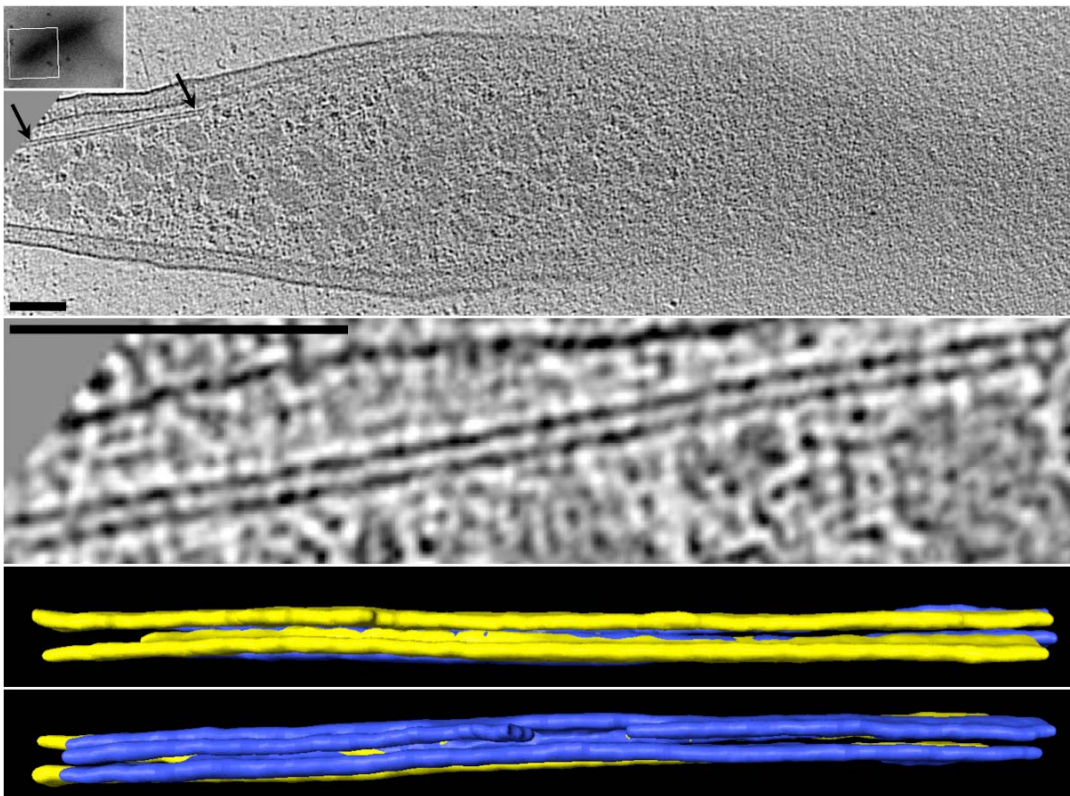

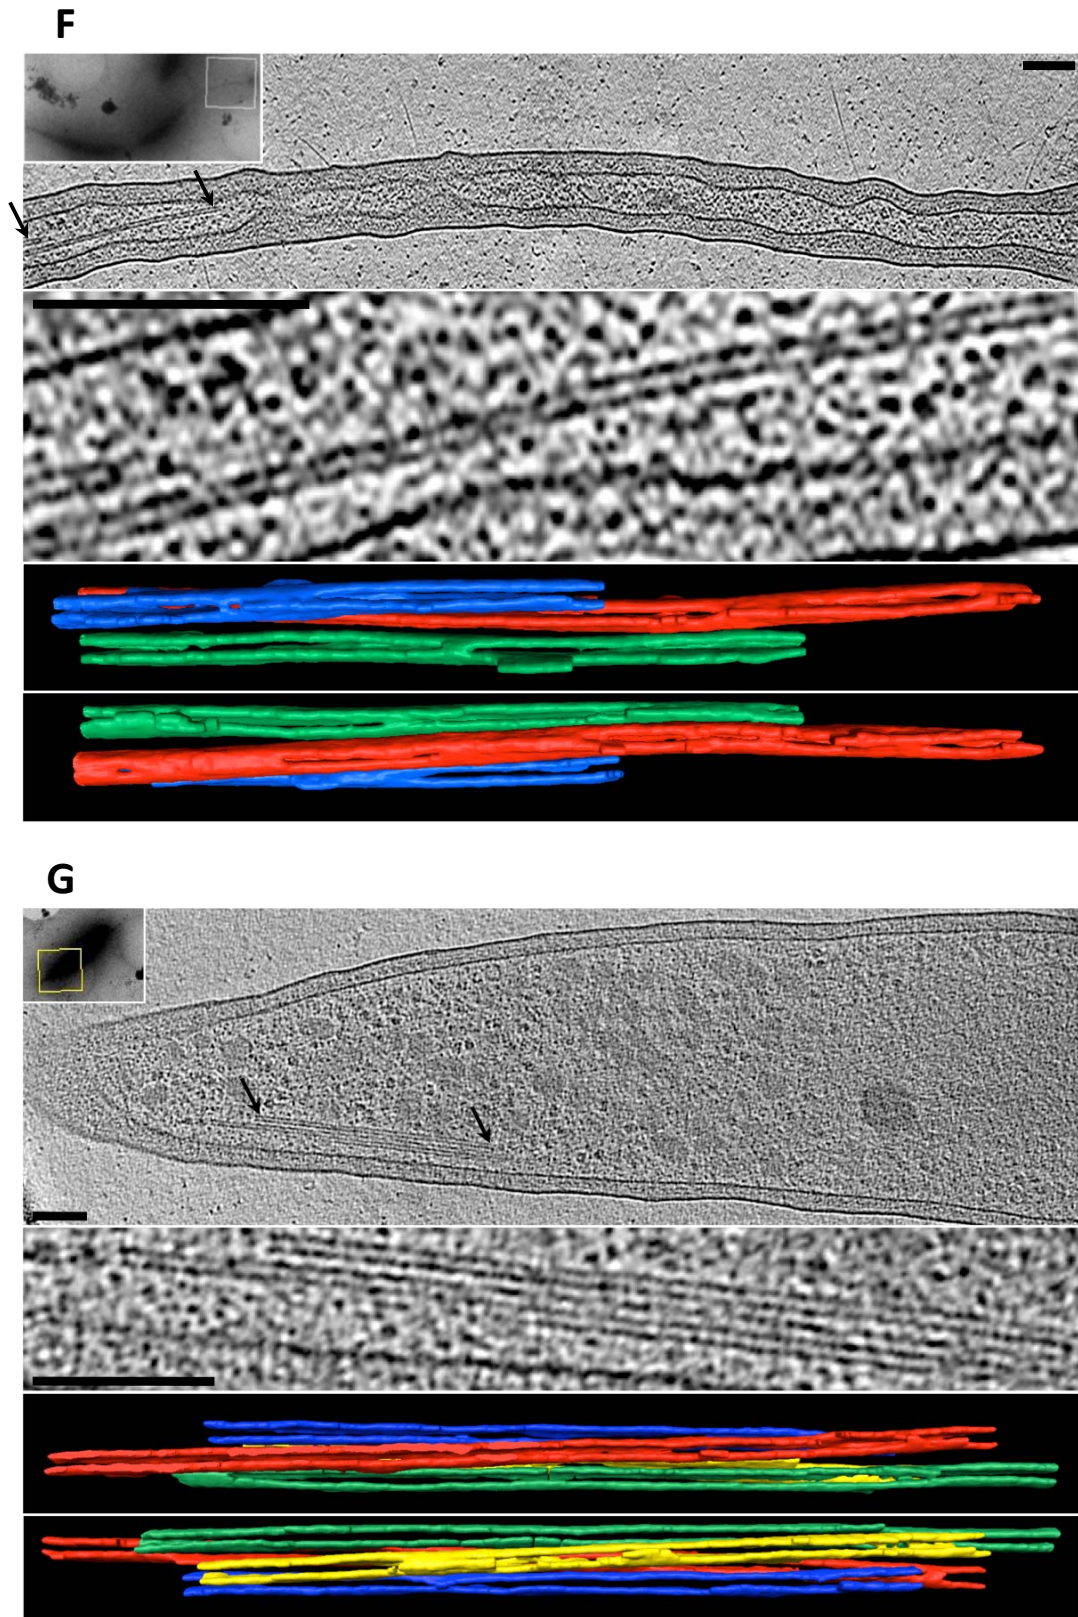

Figure S3. Additional examples of bacterial microtubules in *Prosthecobacter*.
