# Supplementary material for: Microtubules in Bacteria: Ancient Tubulins Build a Five-Protofilament Homolog of the Eukaryotic Cytoskeleton
Source: PubMed Central journal article supplement (PMC3232192; doi:10.1371/journal.pbio.1001213), 2011-12-06
Supplement: pbio.1001213.s005.pdf [file pbio.1001213.s005.pdf]

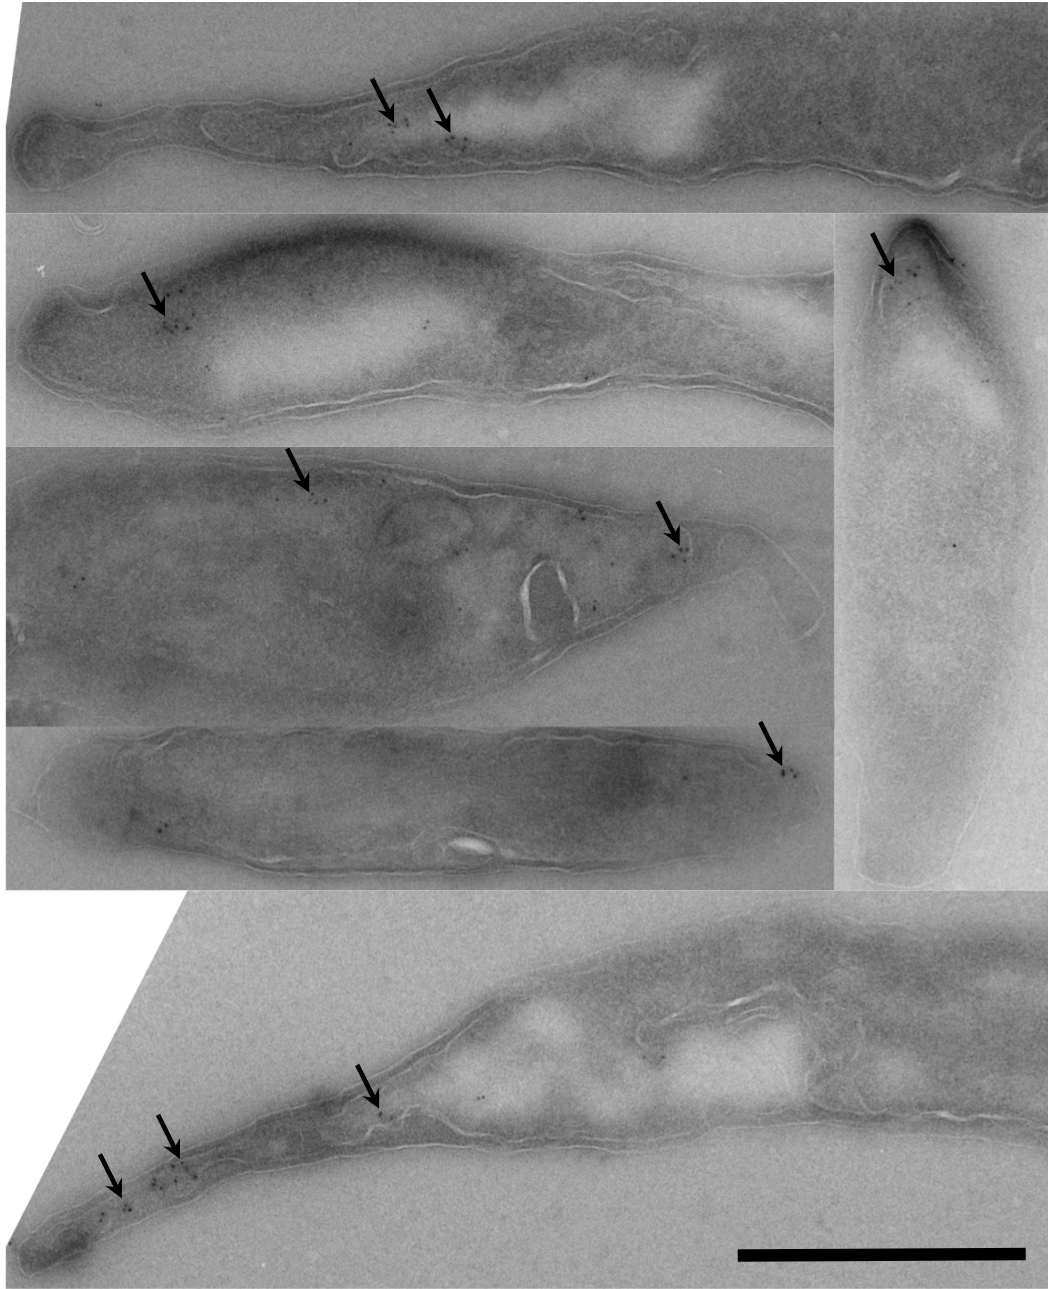

**Figure S5. Localization of BtubB in *P. vanneervanii*.**
