# Supplementary material for: Microtubules in Bacteria: Ancient Tubulins Build a Five-Protofilament Homolog of the Eukaryotic Cytoskeleton
Source: PubMed Central journal article supplement (PMC3232192; doi:10.1371/journal.pbio.1001213), 2011-12-06
Supplement: pbio.1001213.s013.pdf [file pbio.1001213.s013.pdf]

|                           |              | Tubulin |        |     |     |        |        |     |     |       |     |      |     |       | Bacilli |       | archaeal FtsZ-like |      |      | FtsZ |      |     |     |  |
|---------------------------|--------------|---------|--------|-----|-----|--------|--------|-----|-----|-------|-----|------|-----|-------|---------|-------|--------------------|------|------|------|------|-----|-----|--|
|                           |              | BtubA   |        |     |     | BtubB  |        |     |     | Alpha |     | Beta |     | Gamma | Epsilon | Delta | TubZ               | RepX | Hal3 | Hal4 | Hal5 | Pva | Pdb |  |
|                           |              | Pdb A2  | Pdb A1 | Pdj | Pva | Pdb B2 | Pdb B1 | Pdj | Pva | Pte   | Ddi | Ddi  | Pte | Ddi   | Hsa     | Hsa   | Bth                | Bce  |      |      |      |     |     |  |
| <b>Tubulin</b>            | <b>BtubA</b> | Pdb A2  | 100    |     |     |        |        |     |     |       |     |      |     |       |         |       |                    |      |      |      |      |     |     |  |
|                           |              | Pdb A1  | 82     | 100 |     |        |        |     |     |       |     |      |     |       |         |       |                    |      |      |      |      |     |     |  |
|                           |              | Pdj     | 81     | 94  | 100 |        |        |     |     |       |     |      |     |       |         |       |                    |      |      |      |      |     |     |  |
|                           |              | Pva     | 81     | 92  | 93  | 100    |        |     |     |       |     |      |     |       |         |       |                    |      |      |      |      |     |     |  |
|                           | <b>BtubB</b> | Pdb B2  | 35     | 37  | 35  | 37     | 100    |     |     |       |     |      |     |       |         |       |                    |      |      |      |      |     |     |  |
|                           |              | Pdb B1  | 37     | 37  | 36  | 38     | 88     | 100 |     |       |     |      |     |       |         |       |                    |      |      |      |      |     |     |  |
|                           |              | Pdj     | 35     | 37  | 34  | 36     | 90     | 95  | 100 |       |     |      |     |       |         |       |                    |      |      |      |      |     |     |  |
|                           |              | Pva     | 36     | 37  | 36  | 37     | 84     | 90  | 90  | 100   |     |      |     |       |         |       |                    |      |      |      |      |     |     |  |
| <b>Alpha</b>              | Pte          | 39      | 40     | 41  | 40  | 44     | 43     | 43  | 42  | 100   |     |      |     |       |         |       |                    |      |      |      |      |     |     |  |
|                           | Ddi          | 37      | 37     | 38  | 39  | 43     | 42     | 41  | 42  | 71    | 100 |      |     |       |         |       |                    |      |      |      |      |     |     |  |
| <b>Beta</b>               | Ddi          | 38      | 37     | 37  | 38  | 41     | 41     | 41  | 41  | 44    | 44  | 100  |     |       |         |       |                    |      |      |      |      |     |     |  |
|                           | Pte          | 37      | 37     | 38  | 38  | 41     | 41     | 41  | 40  | 45    | 43  | 79   | 100 |       |         |       |                    |      |      |      |      |     |     |  |
| <b>Gamma</b>              | Ddi          | 29      | 31     | 30  | 31  | 38     | 38     | 38  | 38  | 37    | 37  | 37   | 36  | 100   |         |       |                    |      |      |      |      |     |     |  |
| <b>Epsilon</b>            | Hsa          | 31      | 30     | 29  | 29  | 36     | 35     | 35  | 34  | 36    | 34  | 37   | 37  | 31    | 100     |       |                    |      |      |      |      |     |     |  |
| <b>Delta</b>              | Hsa          | 22      | 21     | 23  | 22  | 23     | 23     | 22  | 23  | 24    | 24  | 24   | 24  | 23    | 27      | 100   |                    |      |      |      |      |     |     |  |
| <b>Bacilli</b>            | <b>TubZ</b>  | Bth     | 14     | 13  | 13  | 13     | 15     | 13  | 14  | 14    | 12  | 13   | 14  | 13    | 11      | 11    | 11                 | 100  |      |      |      |     |     |  |
|                           | <b>RepX</b>  | Bce     | 10     | 11  | 12  | 12     | 11     | 12  | 12  | 11    | 12  | 11   | 11  | 11    | 11      | 14    | 12                 | 13   | 100  |      |      |     |     |  |
| <b>archaeal FtsZ-like</b> | <b>FtsZ3</b> | Hal     | 17     | 18  | 19  | 18     | 16     | 16  | 16  | 16    | 16  | 17   | 18  | 14    | 15      | 13    | 17                 | 12   | 100  |      |      |     |     |  |
|                           | <b>FtsZ4</b> | Hal     | 17     | 18  | 19  | 19     | 20     | 18  | 19  | 17    | 17  | 16   | 17  | 17    | 17      | 15    | 16                 | 12   | 41   | 100  |      |     |     |  |
|                           | <b>FtsZ5</b> | Hal     | 15     | 16  | 16  | 16     | 14     | 14  | 13  | 14    | 12  | 11   | 13  | 13    | 12      | 14    | 10                 | 13   | 16   | 31   | 25   | 100 |     |  |
| <b>FtsZ</b>               | Pva          | 15      | 16     | 17  | 17  | 15     | 14     | 14  | 15  | 11    | 13  | 14   | 14  | 15    | 15      | 15    | 15                 | 11   | 12   | 19   | 18   | 17  | 100 |  |
|                           | Pdb          | 16      | 17     | 17  | 18  | 15     | 15     | 15  | 14  | 12    | 13  | 15   | 17  | 17    | 15      | 15    | 14                 | 11   | 19   | 19   | 15   | 80  | 100 |  |

**Table S2. Sequence identities within the Tubulin/FtsZ superfamily.**
