# Supplementary material for: Microtubules in Bacteria: Ancient Tubulins Build a Five-Protofilament Homolog of the Eukaryotic Cytoskeleton
Source: PLoS Biol. 2011 Dec 6;9(12):e1001213. doi: 10.1371/journal.pbio.1001213 (PMC3232192; doi:10.1371/journal.pbio.1001213)
Supplement: Table S1 — BtubA and BtubB protein motif search. PRINTS [51] was used to identify defining motifs of tubulin-related proteins (all tubulins, alpha, beta, gamma, delta, epsilon, and FtsZ) in four different BtubA and BtubB proteins (from P. dejongeii, P. vanneervenii, P. debontii operon 1, and P. debontii operon 2). The chart lists the number of motifs a protein shares with each group, as well as the “P-value” (the probability that a random sequence would achieve a higher score). BtubA and BtubB are clearly more similar to eukaryotic tubulin than to bacterial FtsZ, but they do not belong to any particular eukaryotic tubulin subfamily (as a control, the P-value of human α-tubulin with the α-tubulin subfamily is 10−121). (PDF) [file pbio.1001213.s012.pdf]

| BtubA                       |               |                      | BtubB                       |               |                      |
|-----------------------------|---------------|----------------------|-----------------------------|---------------|----------------------|
| Group                       | No. of motifs | P value              | Group                       | No. of motifs | P value              |
| <i>P. dejongeii</i>         |               |                      | <i>P. dejongeii</i>         |               |                      |
| Tubulin                     | 9 of 9        | $1.4 \times e^{-62}$ | Tubulin                     | 9 of 9        | $1.9 \times e^{-72}$ |
| alpha tubulin               | 7 of 13       | $5.9 \times e^{-17}$ | beta tubulin                | 8 of 13       | $4.2 \times e^{-26}$ |
| beta tubulin                | 6 of 13       | $1.4 \times e^{-14}$ | epsilon tubulin             | 6 of 10       | $3.3 \times e^{-19}$ |
| epsilon tubulin             | 4 of 10       | $1.2 \times e^{-15}$ | alpha tubulin               | 5 of 13       | $2.5 \times e^{-14}$ |
| delta tubulin               | 3 of 12       | $1.9 \times e^{-12}$ | gamma tubulin               | 4 of 8        | $1.4 \times e^{-13}$ |
| gamma tubulin               | 5 of 8        | $3.3 \times e^{-11}$ | FtsZ                        | 3 of 6        | $1.7 \times e^{-10}$ |
| FtsZ                        | 2 of 6        | $8.3 \times e^{-6}$  | delta tubulin               | 2 of 12       | $5.6 \times e^{-9}$  |
| <i>P. vanneervanii</i>      |               |                      | <i>P. vanneervanii</i>      |               |                      |
| Tubulin                     | 9 of 9        | $3.4 \times e^{-61}$ | Tubulin                     | 9 of 9        | $1.2 \times e^{-72}$ |
| beta tubulin                | 8 of 13       | $4.2 \times e^{-16}$ | beta tubulin                | 8 of 13       | $3.9 \times e^{-25}$ |
| epsilon tubulin             | 4 of 10       | $2.0 \times e^{-14}$ | epsilon tubulin             | 6 of 10       | $3.4 \times e^{-20}$ |
| alpha tubulin               | 6 of 13       | $6.4 \times e^{-14}$ | gamma tubulin               | 5 of 8        | $1.8 \times e^{-14}$ |
| delta tubulin               | 3 of 12       | $1.2 \times e^{-13}$ | alpha tubulin               | 4 of 13       | $2.2 \times e^{-11}$ |
| gamma tubulin               | 5 of 8        | $1.2 \times e^{-11}$ | delta tubulin               | 2 of 12       | $5.6 \times e^{-10}$ |
| FtsZ                        | 2 of 6        | $1.4 \times e^{-6}$  | FtsZ                        | 2 of 6        | $1.5 \times e^{-8}$  |
| <i>P. debontii</i> operon 1 |               |                      | <i>P. debontii</i> operon 1 |               |                      |
| Tubulin                     | 9 of 9        | $3.5 \times e^{-61}$ | Tubulin                     | 9 of 9        | $1.6 \times e^{-72}$ |
| epsilon tubulin             | 4 of 10       | $2.5 \times e^{-15}$ | beta tubulin                | 8 of 13       | $4.2 \times e^{-26}$ |
| beta tubulin                | 6 of 13       | $6.3 \times e^{-15}$ | epsilon tubulin             | 6 of 10       | $1.6 \times e^{-20}$ |
| alpha tubulin               | 7 of 13       | $6.6 \times e^{-15}$ | gamma tubulin               | 5 of 8        | $1.8 \times e^{-13}$ |
| delta tubulin               | 4 of 12       | $1.2 \times e^{-13}$ | alpha tubulin               | 5 of 13       | $9.3 \times e^{-13}$ |
| gamma tubulin               | 5 of 8        | $6.5 \times e^{-11}$ | delta tubulin               | 2 of 12       | $9.6 \times e^{-10}$ |
| FtsZ                        | 2 of 6        | $8.2 \times e^{-6}$  | FtsZ                        | 2 of 6        | $4.1 \times e^{-9}$  |
| <i>P. debontii</i> operon 2 |               |                      | <i>P. debontii</i> operon 2 |               |                      |
| Tubulin                     | 9 of 9        | $4.5 \times e^{-58}$ | Tubulin                     | 9 of 9        | $2.2 \times e^{-73}$ |
| beta tubulin                | 7 of 13       | $1.5 \times e^{-15}$ | beta tubulin                | 7 of 13       | $6.3 \times e^{-24}$ |
| epsilon tubulin             | 4 of 10       | $1.8 \times e^{-15}$ | epsilon tubulin             | 6 of 10       | $2.6 \times e^{-20}$ |
| alpha tubulin               | 5 of 13       | $1.4 \times e^{-14}$ | gamma tubulin               | 5 of 8        | $5.1 \times e^{-14}$ |
| gamma tubulin               | 4 of 8        | $1.2 \times e^{-7}$  | alpha tubulin               | 5 of 13       | $2.3 \times e^{-12}$ |
| FtsZ                        | 2 of 6        | $8.3 \times e^{-6}$  | FtsZ                        | 3 of 6        | $1.4 \times e^{-10}$ |
| delta tubulin               | 2 of 12       | $1.5 \times e^{-5}$  | delta tubulin               | 2 of 12       | $4.1 \times e^{-10}$ |

**Table S1. BtubA and BtubB protein motif search.**
